# Supplementary material for: Quantum chemical modeling of enantioselective sulfoxidation and epoxidation reactions by indole monooxygenase VpIndA1
Source: Royal Society of Chemistry journal article supplement (doi:10.1039/d4cp00552j), 2024-01-01
Supplement: d4cp00552j3.pdf [file d4cp00552j3.pdf]

## **Supporting Information**

# **Quantum Chemical Modeling of Enantioselective Sulfoxidation and Epoxidation Reactions by Indole Monooxygenase *VpIndA1***

Qinrou Li<sup>1,2</sup>, Shiqing Zhang<sup>2,3</sup>, Fufeng Liu<sup>1</sup>, Hao Su<sup>2,3</sup>, Xiang Sheng<sup>2,3\*</sup>

<sup>1</sup> *College of Biotechnology, Tianjin University of Science and Technology, Tianjin, 300457 P. R. China*

<sup>2</sup> *Tianjin Institute of Industrial Biotechnology, Chinese Academy of Sciences, Tianjin 300308, P. R. China*

<sup>3</sup> *National Center of Technology Innovation for Synthetic Biology, National Engineering Research Center of Industrial Enzymes and Key Laboratory of Engineering Biology for Low-Carbon Manufacturing, Tianjin 300308, P.R. China*

\* Corresponding author: shengx@tib.cas.cn

## Contents

|                                                                                          |     |
|------------------------------------------------------------------------------------------|-----|
| 1. Selected residues in the computational model .....                                    | S2  |
| 2. Prediction of the pKa values of Glu218 and Asp300 .....                               | S3  |
| 3. Results on the MPS sulfoxidation involving FAD <sub>oo</sub> - .....                  | S4  |
| 4. Results on the indene epoxidation involving FAD <sub>oo</sub> - .....                 | S5  |
| 5. Other optimized structures of the E:MPS complexes .....                               | S6  |
| 6. Transition states for the MPS sulfoxidation with the “phenyl-right” mode .....        | S7  |
| 7. Other structures of the transition state for the MPS sulfoxidation .....              | S8  |
| 8. Optimized structures of the E:MPSO complexes .....                                    | S9  |
| 9. Schematic representation of MPS-TS <sub>R</sub> and MPS-TS <sub>S</sub> .....         | S10 |
| 10. Comparison of the active site structures of <i>Pp</i> StyA and <i>Vp</i> IndA1 ..... | S11 |
| 11. Optimized structures of the lowest-energy E:indene complexes .....                   | S12 |
| 12. Other optimized structures of the E:indene complexes .....                           | S13 |
| 13. Transition states for the indene epoxidation with the “phenyl-right” mode .....      | S14 |
| 14. Other structures of the transition state for the indene epoxidation .....            | S15 |
| 15. Optimized structures of the indene-Int complexes .....                               | S16 |
| 16. Optimized structures of the E:IO complexes .....                                     | S17 |
| 17. Optimized structures for the Phe191Met/Phe201Leu/Ile302Val reaction .....            | S18 |
| 18. Results on the intrinsic reaction coordinate (IRC) analysis .....                    | S19 |
| 19. Absolute energies and energy corrections .....                                       | S21 |
| 20. References .....                                                                     | S22 |

## 1. Selected residues in the computational model

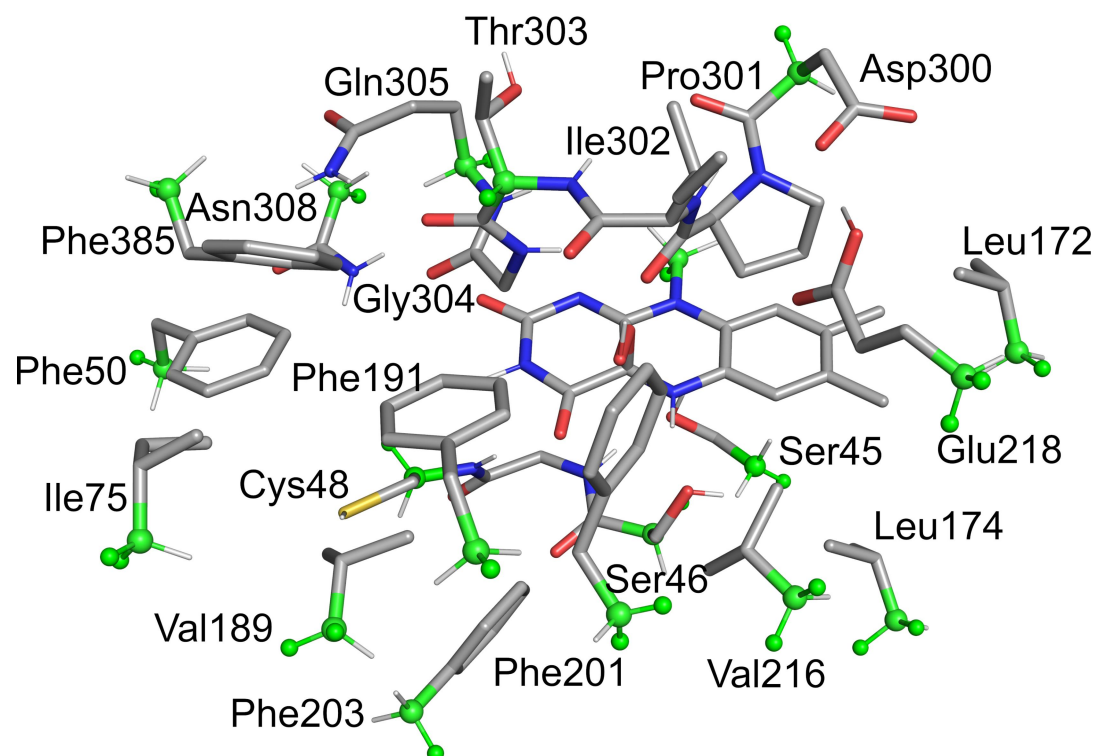

**Figure S1.** The selected residues in the computational cluster model used in the present study, in which Asp300 is in the deprotonated state and Glu218 is in the protonated state. The FAD<sub>OOH</sub> is also shown in the figure. The model was designed based on the crystal structure of the wide-type *VpIndA1* (PDB:7Z4X). Atoms fixed during geometry optimization are shown in green color with balls and sticks. For clarity, most of the hydrogen atoms are omitted in the figure.

## 2. Prediction of the pKa values of Glu218 and Asp300

**Table S1.** Prediction of the pKa values of Glu218 and Asp300 by the constant pH molecular dynamics simulations (CpHMD) at the experimental pH (7.5) using wide-type *VpIndA1* in complex with FAD.

| Generalized Born implicit solvent model |        | Explicit solvent |        |
|-----------------------------------------|--------|------------------|--------|
|                                         | Glu218 | Asp300           |        |
| pKa                                     | 10.36  | 1.50             | 13.20  |
|                                         |        |                  | Asp300 |
|                                         |        |                  | 1.80   |

### Technical Details of the constant pH molecular dynamics (CpHMD) simulations

The AMBER 20 software was used for conducting CpHMD simulations.<sup>1</sup> The starting structure was constructed based on the crystal structure of wide-type *VpIndA1* crystallized with FAD (PDB ID:7Z4X). The AMBER ff99SB force field coupled with the necessary modifications for CpHMD simulations was used, and salt concentration was set to 0.1 M.<sup>2-4</sup> Both implicit and explicit solvents were considered for the prediction of the pKa values of Glu218 and Asp300. The general AMBER force field (gaff2) was applied to FAD.<sup>5</sup> The constructed model was solvated in the 12 Å TIP3P water box and neutralized by adding sodium ions in the explicit solvent model.<sup>6</sup> The GB model developed by Onufriev et al. (igb=2)<sup>7</sup> was used for the implicit solvent model. To maintain the micro-environment of the residues as that in the crystal structure, a harmonic potential of 5 kcal/mol/ Å<sup>2</sup> was applied to the protein backbones and FAD during the simulations. Simulation of each solvent model lasted for 100 ns in a production MD run with a time step of 2 fs. Protonation state changes were attempted every 25 steps in both solvent models, and in the explicit solvent model, solvent water relaxation occurred every 100 steps.

**Table S2.** Predicted pKa values of Glu218 and Asp300 by the PROPKA server<sup>8,9</sup>.

| Prediction by PROPKA |        |        |
|----------------------|--------|--------|
|                      | Glu218 | Asp300 |
| pKa                  | 12.66  | 5.92   |

### 3. Results on the MPS sulfoxidation involving FAD<sub>oo</sub>-

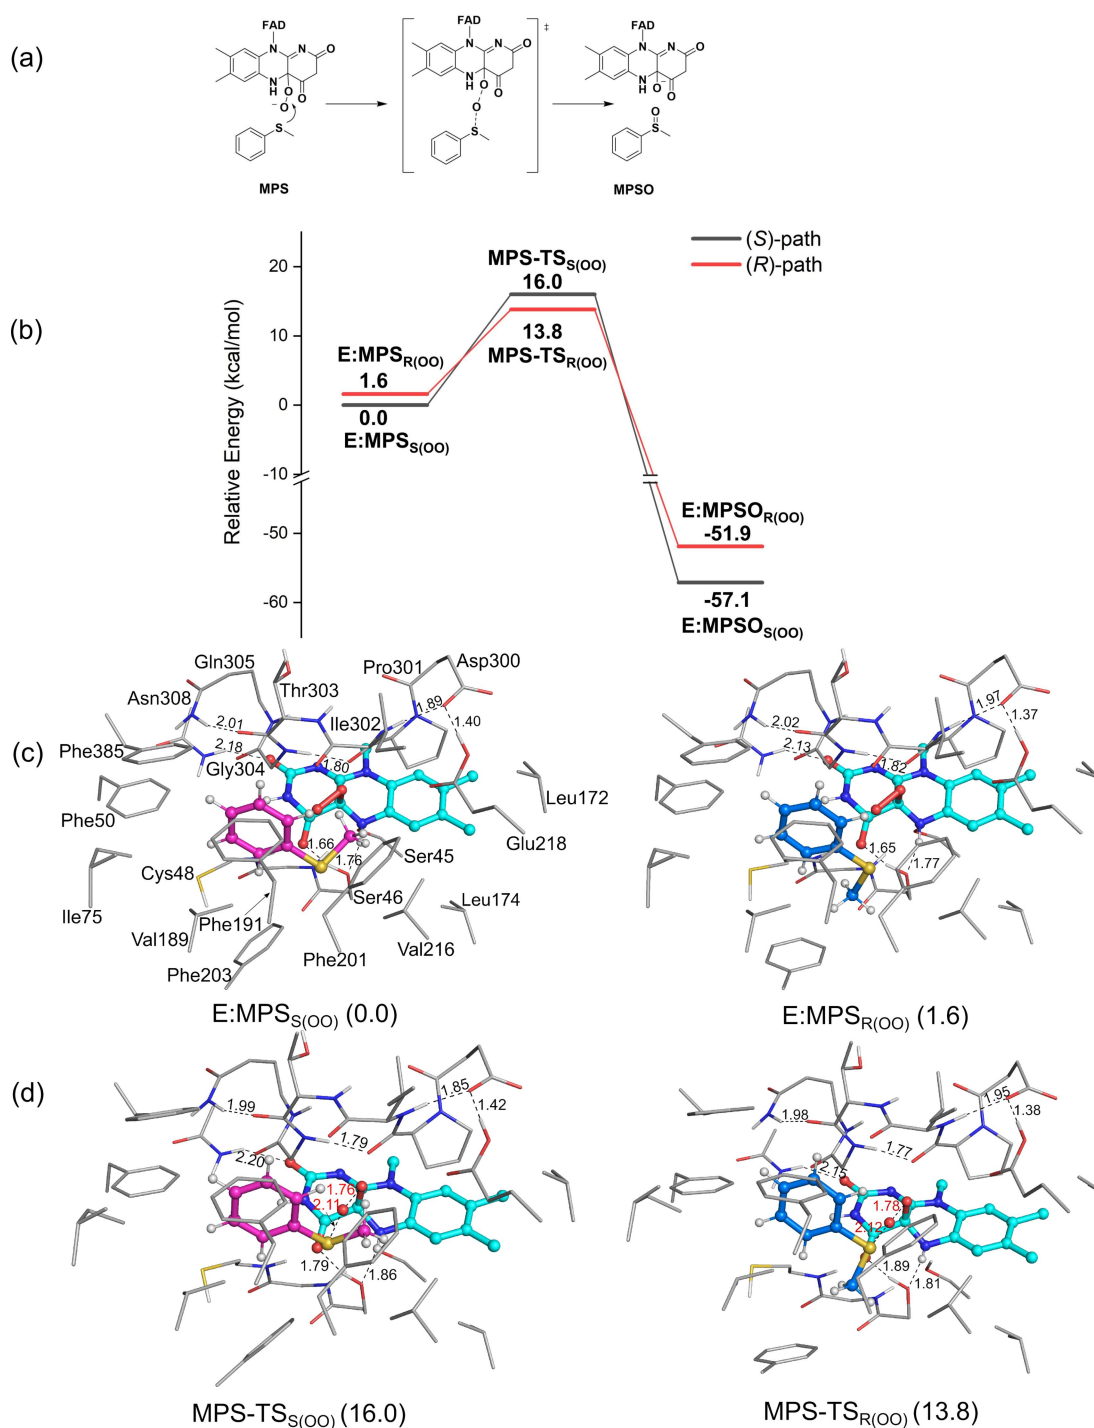

**Figure S2.** Calculation results on the MPS sulfoxidation involving FAD<sub>oo</sub>- rather than FAD<sub>ooH</sub> in the proposed mechanism: (a) Reaction mechanism, (b) Energy profile, (c) structures of the enzyme-substrate complexes and (d) structures of the transition states. The energies relative to **E:MPS<sub>R(oo)</sub>** are provided in parentheses in kcal/mol. For clarity, most of the hydrogen atoms are omitted in the figure.

#### 4. Results on the indene epoxidation involving FAD<sub>OO</sub>.

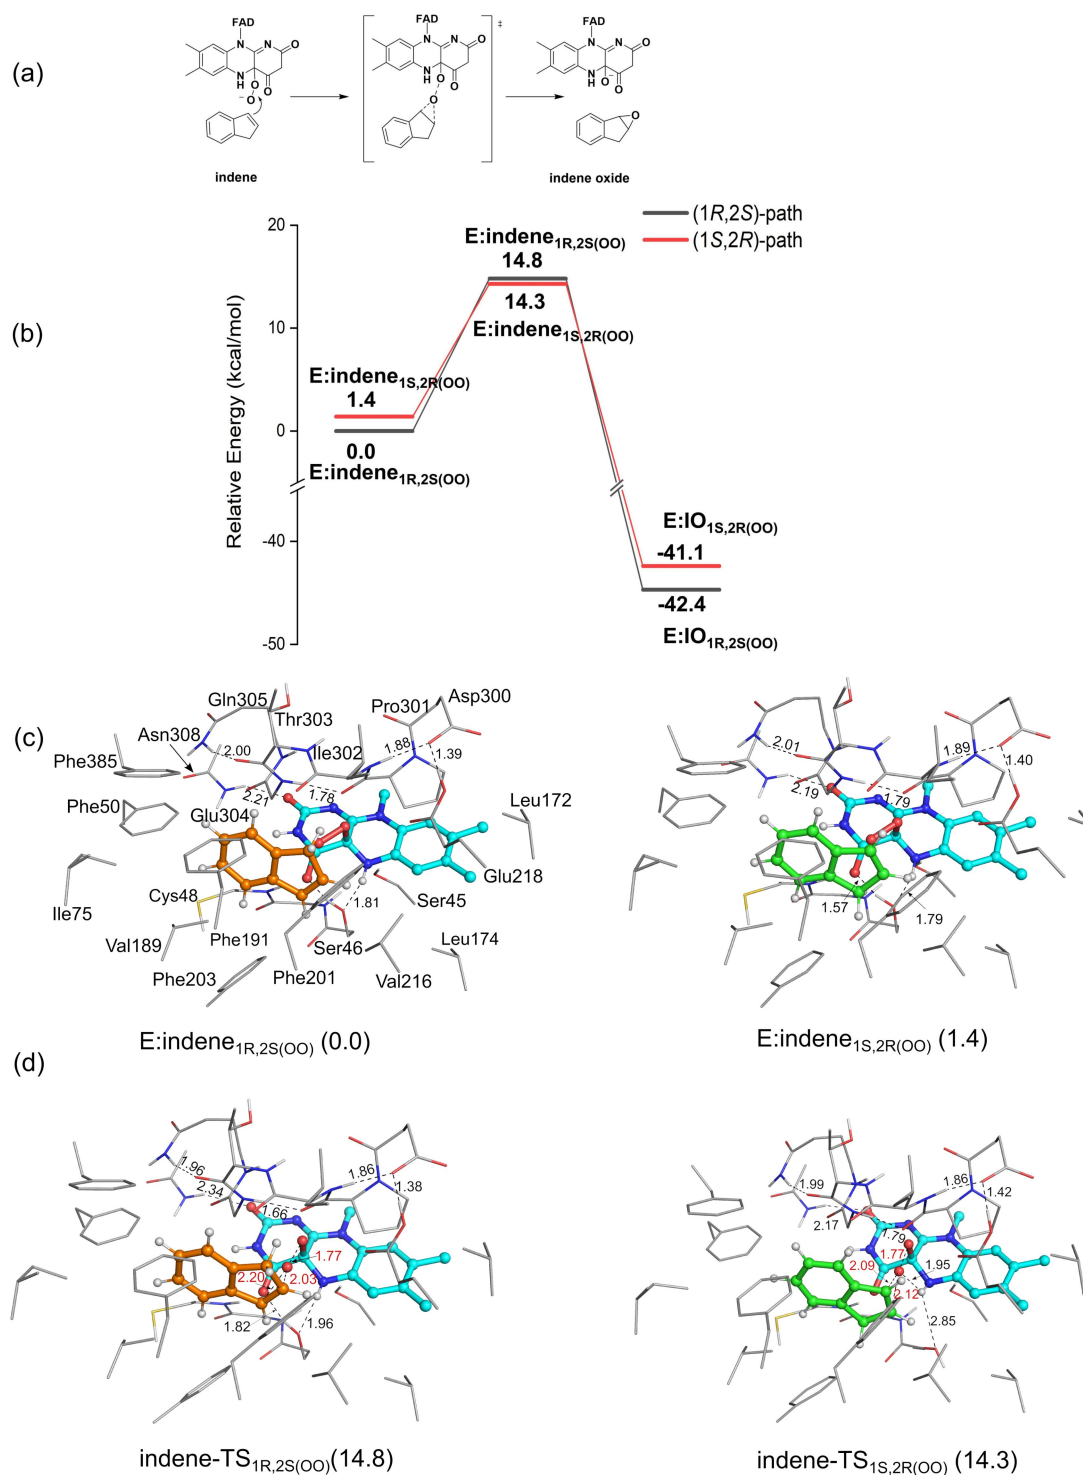

**Figure S3.** Calculation results on the indene epoxidation involving FAD<sub>OO</sub> rather than FAD<sub>OOH</sub> in the proposed mechanism: (a) Reaction mechanism, (b) Energy profile, (c) structures of the enzyme-substrate complexes and (d) structures of the transition states. The energies relative to **E:indene<sub>1R,2S(00)</sub>** are provided in parentheses in kcal/mol. For clarity, most of the hydrogen atoms are omitted in the figure.

## 5. Other optimized structures of the E:MPS complexes

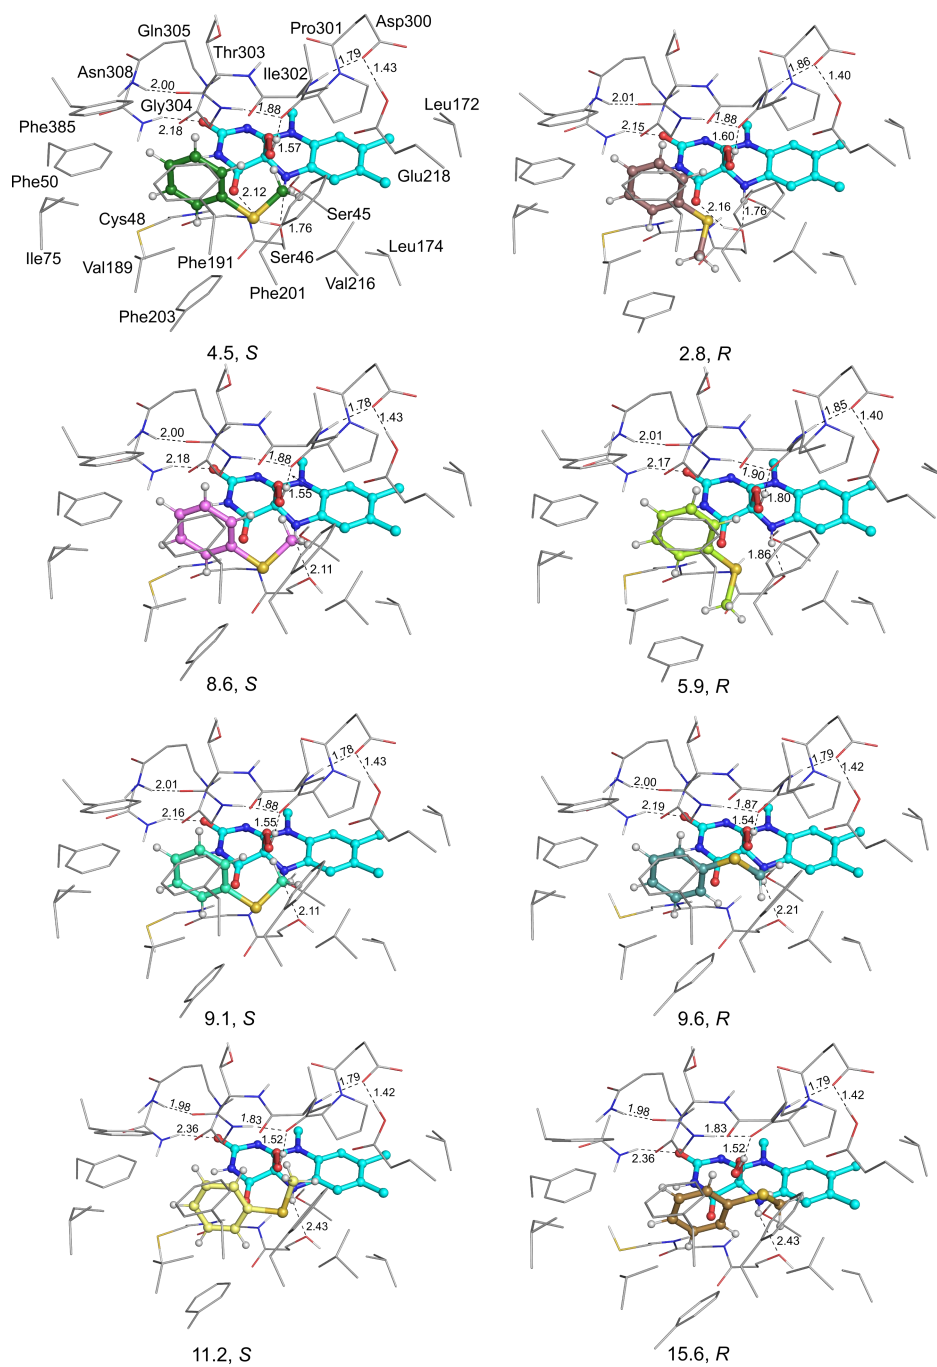

**Figure S4.** Other optimized structures of E:MPS with different conformation of the MPS substrate in addition to those shown in **Figure 3** in the main text. The energies are all relative to the energies of E:MPSs in the main text and are given in kcal/mol. For clarity, most of the hydrogen atoms are omitted in the figure. Selected distances are given in Å.

## 6. Transition states for the MPS sulfoxidation with the “phenyl-right” mode

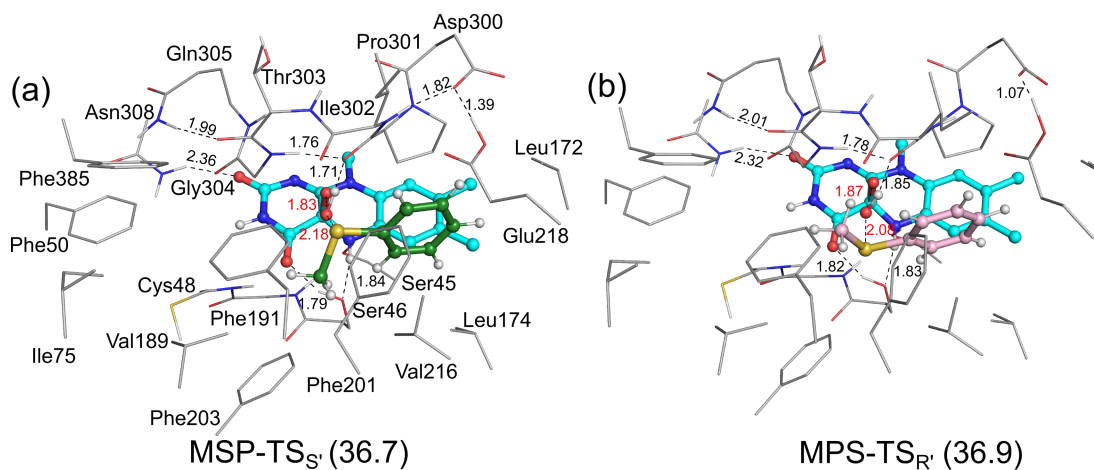

**Figure S5.** The optimized structures of TSs with the “Phenyl-right” mode are involved in (a) the *R*-pathway and (b) the *S*-pathway. The energies, provided in parentheses in kcal/mol, are all referenced relative to **E:MPS**s in the main text. For clarity, most of the hydrogen atoms are omitted in the figure. Selected distances are given in Å.

## 7. Other structures of the transition state for the MPS sulfoxidation

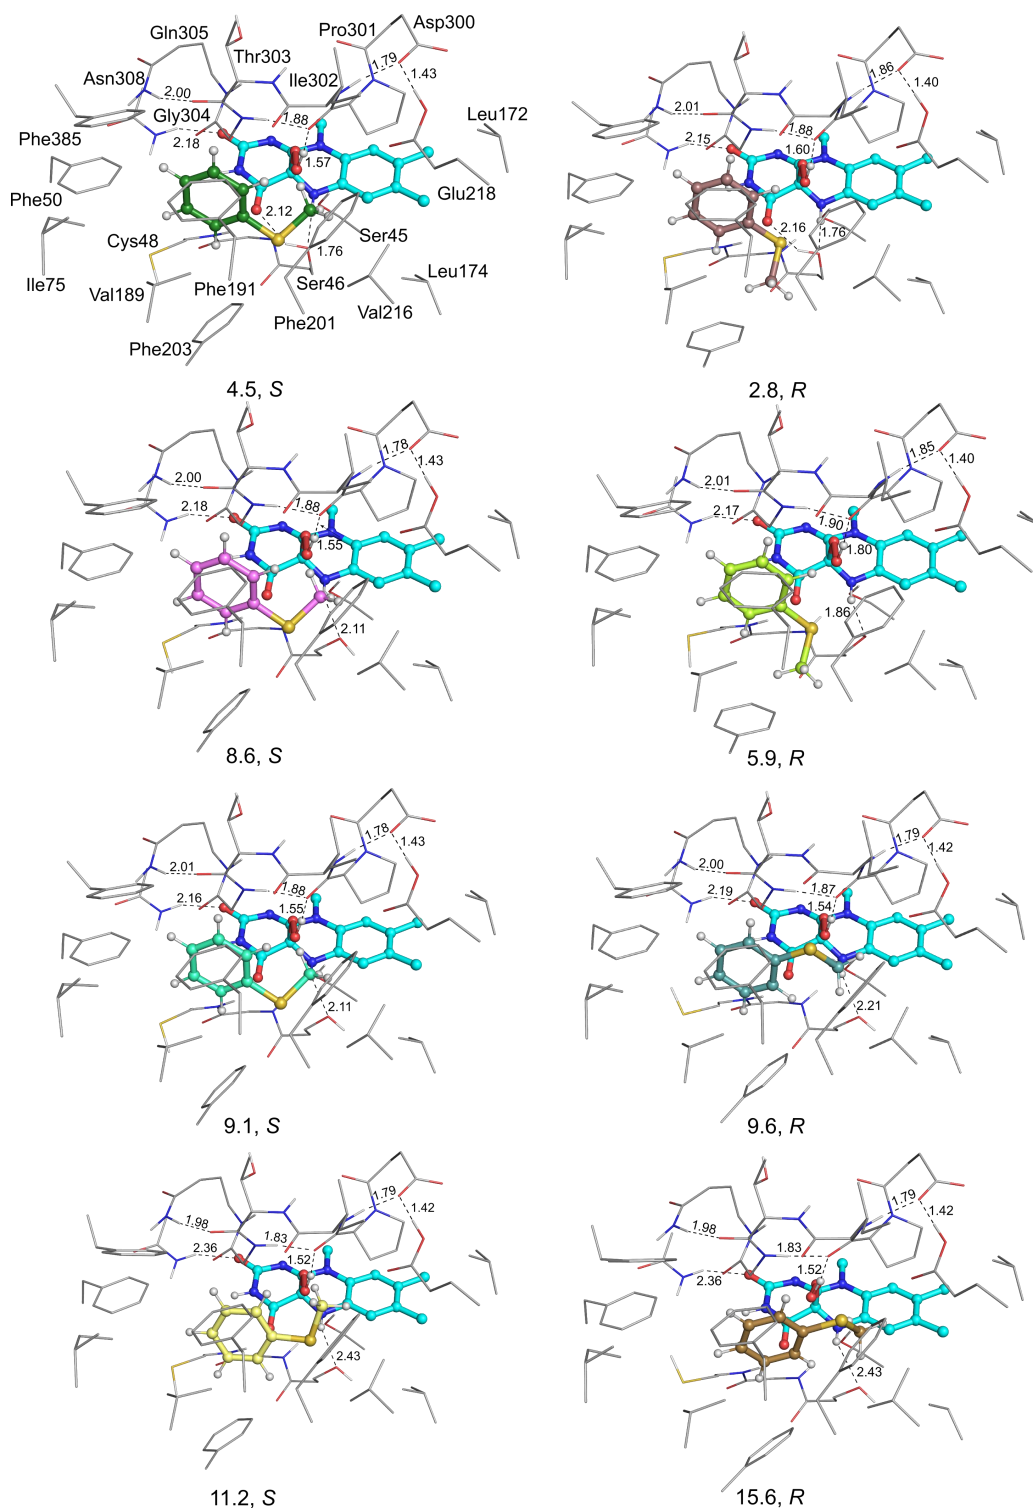

**Figure S6.** Other optimized structures of the TSs for the sulfoxidation reaction in addition to those shown in **Figure 4** in the main text. The energies are all relative to the energies of **E:MPS**s in the main text and are given in kcal/mol. For clarity, most of the hydrogen atoms are omitted in the figure. Selected distances are given in Å.

## 8. Optimized structures of the E:MPSO complexes

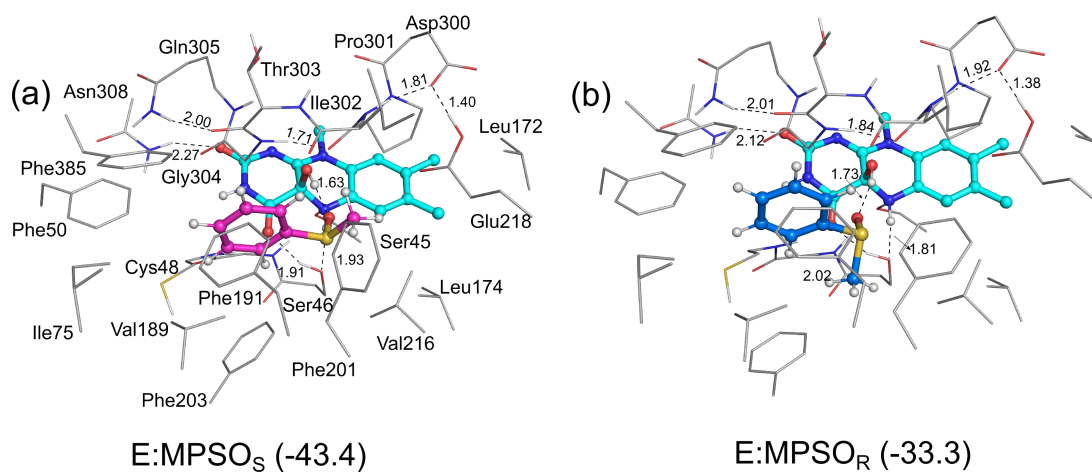

**Figure S7.** Optimized structures of **E:MPSO<sub>S</sub>** and **E:MPSO<sub>R</sub>**. The energies, provided in parentheses in kcal/mol, are all referenced relative to **E:MPS<sub>S</sub>** in the main text. For clarity, most of the hydrogen atoms are omitted in the figure. Selected distances are given in Å.

## 9. Schematic representation of MPS-TS<sub>R</sub> and MPS-TS<sub>S</sub>

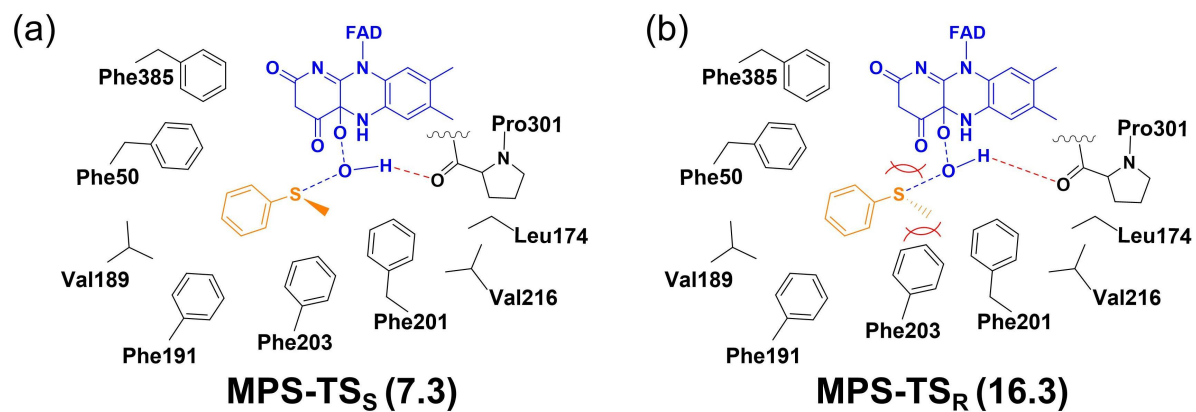

**Figure S8.** Schematic representation of **MPS-TS<sub>S</sub>** and **MPS-TS<sub>R</sub>** involved in the sulfoxidation reaction. The energies, provided in parentheses in kcal/mol, are all referenced relative to **E:MPS<sub>S</sub>** in the main text.

## 10. Comparison of the active site structures of *Pp*StyA and *Vp*IndA1

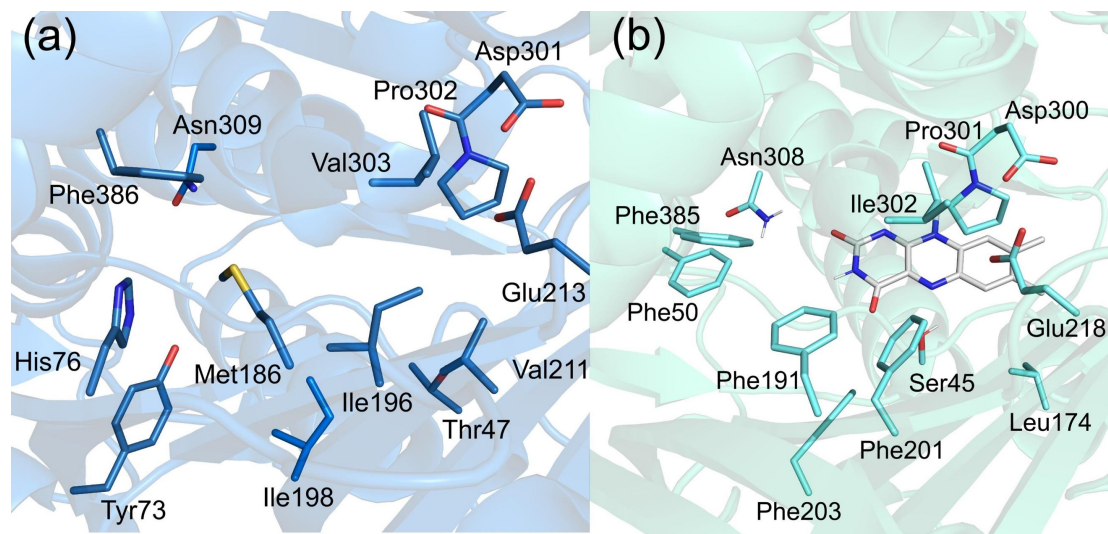

**Figure S9.** Active site structures of (a) the styrene monooxygenase from *Pseudomonas putida* (*Pp*StyA, PDB 3IHM)<sup>10</sup> and (b) *Vp*IndA1 (PDB 7Z4X)<sup>11</sup>.

## 11. Optimized structures of the lowest-energy E:indene complexes

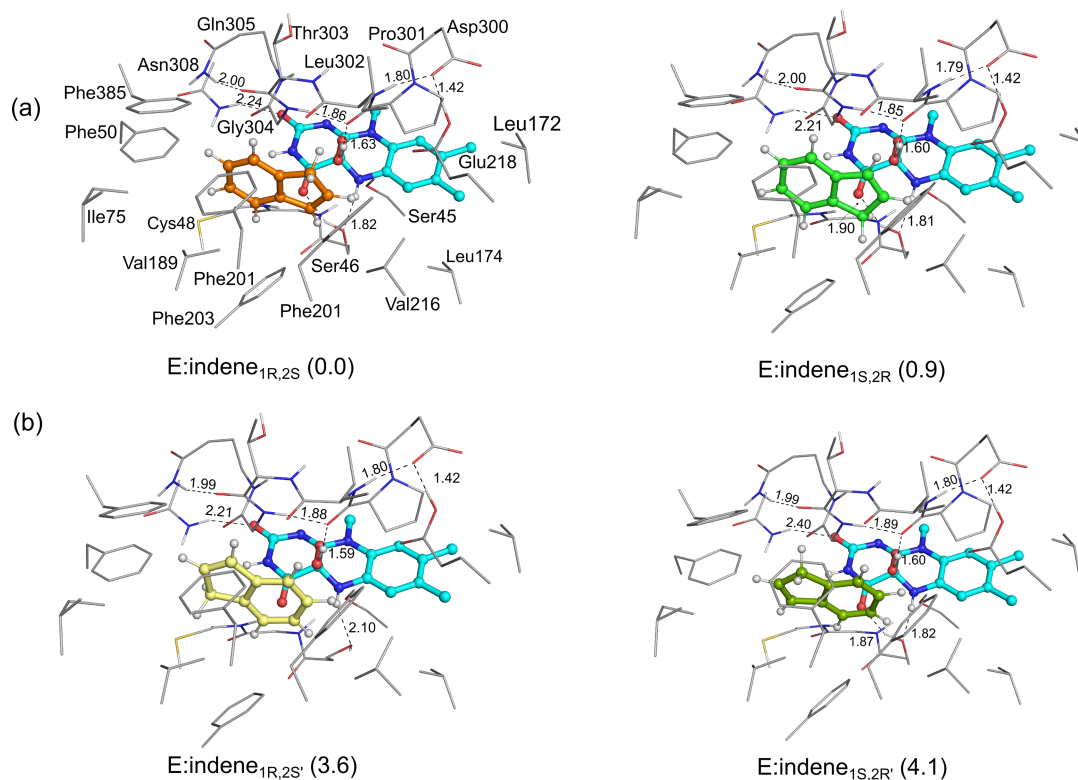

**Figure S10.** Optimized structures of the lowest-energy ES complexes with the “Phenyl-left” mode (a) and with the “Phenyl-right” mode (b). The subscript 1R,2S (in **E: indene**<sub>1R,2S</sub> and **E:indene**<sub>1R,2S'</sub>) and the 1S,2R (in **E: indene**<sub>1S,2R</sub> and **E: indene**<sub>1S,2R'</sub>) denote the configurations of the respective products originating from this ES complex. The energies, which are provided in parentheses in kcal/mol, are relative to **E:indene**<sub>1R,2S</sub>. For clarity, most of the hydrogen atoms are omitted in the figure. Selected distances are given in Å.

## 12. Other optimized structures of the E:indene complexes

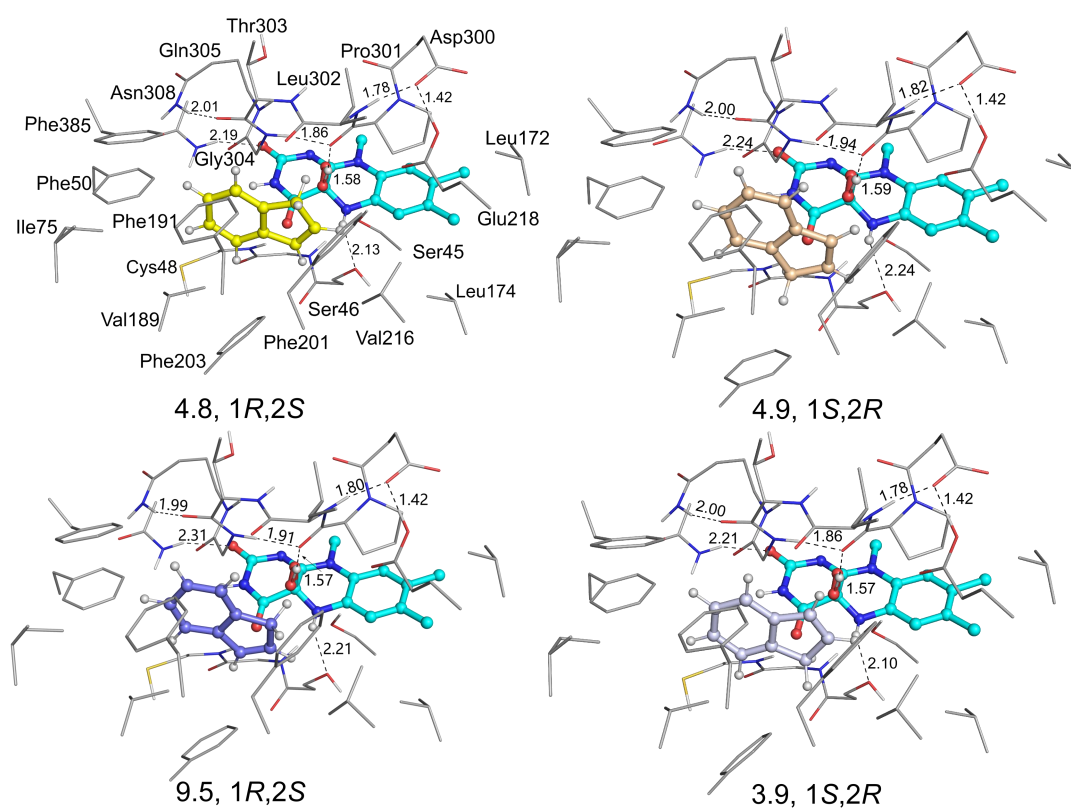

**Figure S11.** Other optimized structures of **E:indene** with different conformation of the indene substrate in addition to those shown in **Figure S10**. The energies are all relative to the energies of **E:indene**<sub>1R,2S</sub> in **Figure S10** and are given in kcal/mol. For clarity, most of the hydrogen atoms are omitted in the figure. Selected distances are given in Å.

### 13. Transition states for the indene epoxidation with the “phenyl-right” mode

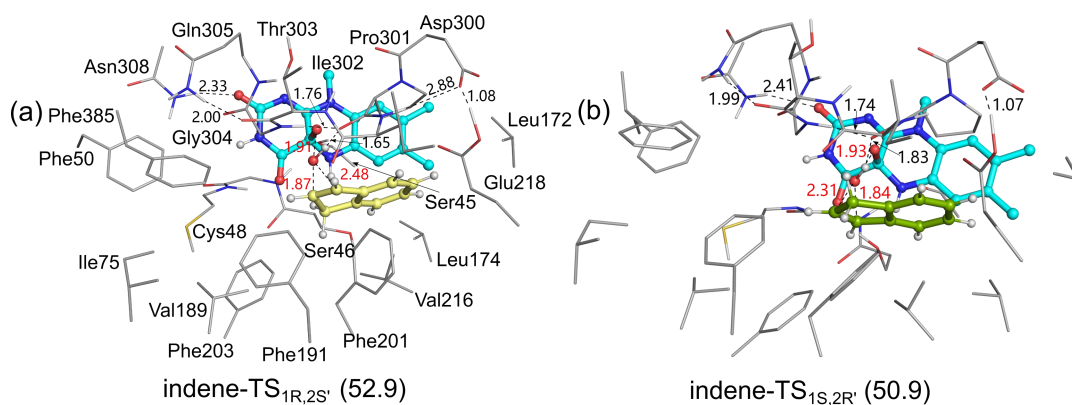

**Figure S12.** The optimized structures of TSs with the “Phenyl-right” mode involved in (a) the (1*R*,2*S*)-pathway and (b) the (1*S*,2*R*)-pathway. The energies, provided in parentheses in kcal/mol, are all referenced relative to **E:indene**<sub>1*R*,2*S*</sub> in **Figure S10**. For clarity, most of the hydrogen atoms are omitted in the figure. Selected distances are given in Å.

## 14. Other structures of the transition state for the indene epoxidation

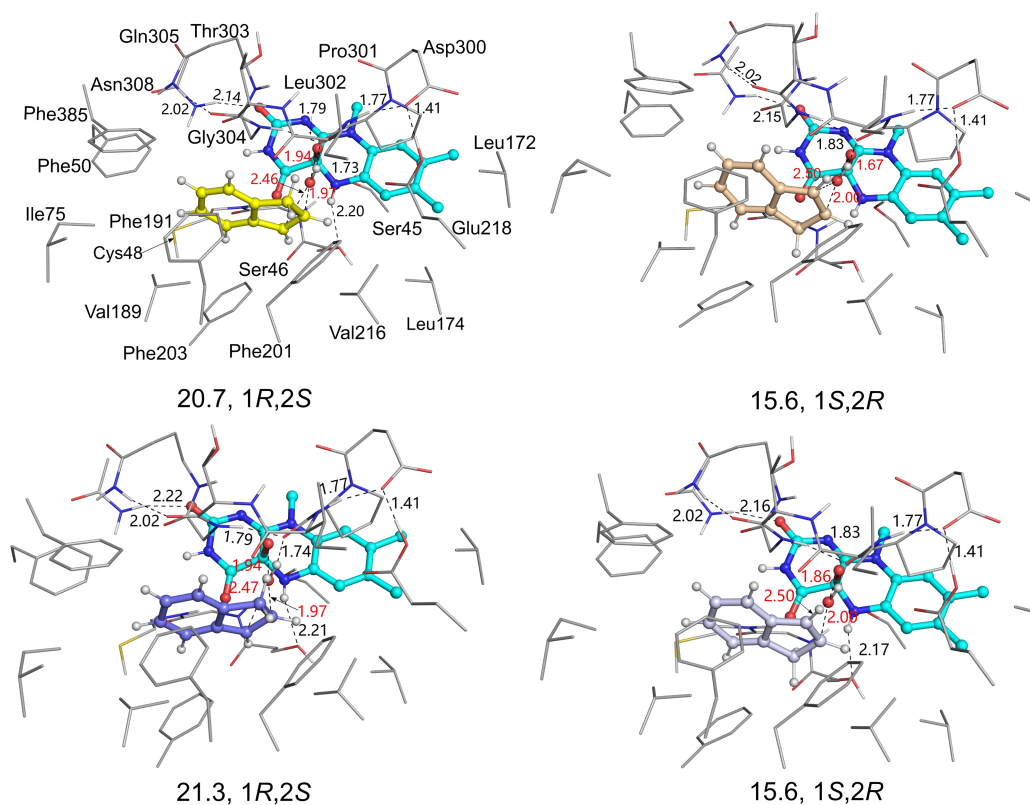

**Figure S13.** Other optimized structures of the TSs for the indene epoxidation in addition to those shown in **Figure 5** in the main text. The energies are all relative to the energies of **E:indene**<sub>1R,2S</sub> in **Figure S10** and are given in kcal/mol. For clarity, most of the hydrogen atoms are omitted in the figure. Selected distances are given in Å.

## 15. Optimized structures of the indene-Int complexes

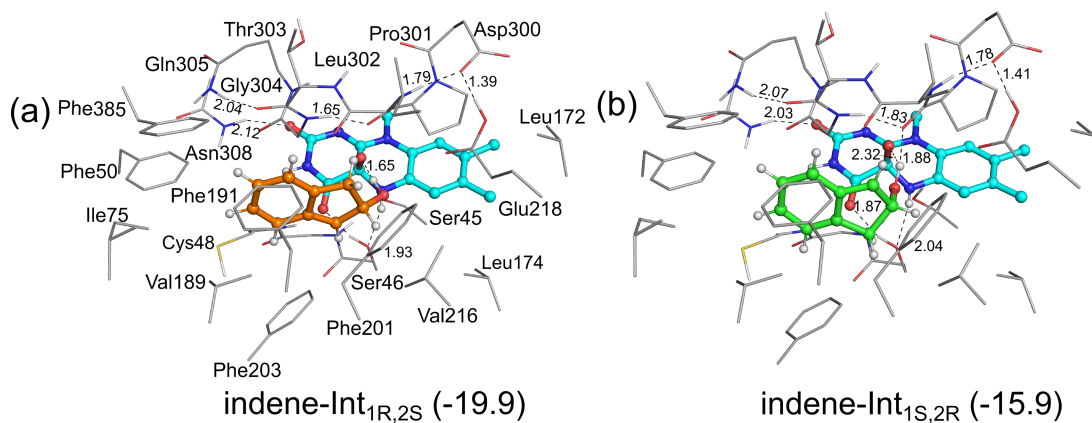

**Figure S14.** Optimized structures of **indene-Int<sub>1R,2S</sub>** and **indene-Int<sub>1S,2R</sub>**. The energies, provided in parentheses in kcal/mol, are all referenced relative to **E:indene<sub>1R,2S</sub>** in **Figure S10**. For clarity, most of the hydrogen atoms are omitted in the figure. Selected distances are given in Å.

## 16. Optimized structures of the E:IO complexes

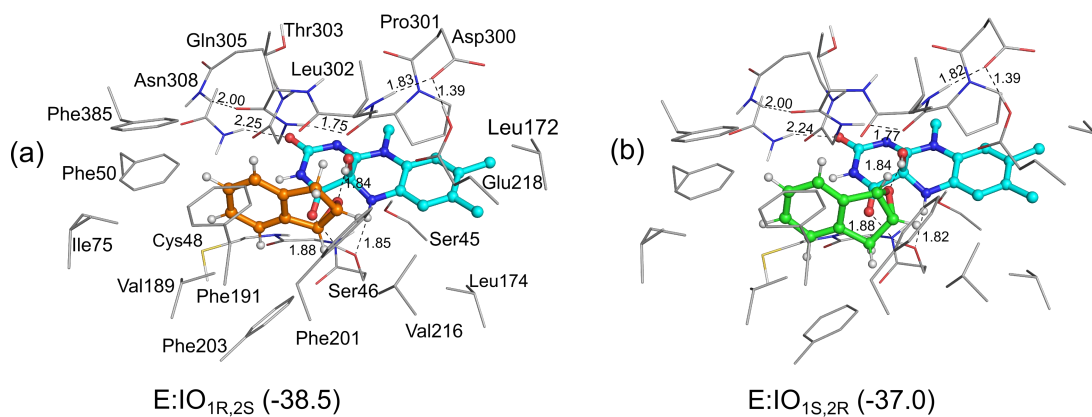

**Figure S15.** Optimized structures of **E:IO<sub>1R,2S</sub>** and **E:IO<sub>1S,2R</sub>**. The energies, provided in parentheses in kcal/mol, are all referenced relative to **E:indene<sub>1R,2S</sub>** in **Figure S10**. For clarity, most of the hydrogen atoms are omitted in the figure. Selected distances are given in Å.

## 17. Optimized structures for the Phe191Met/Phe201Leu/Ile302Val reaction

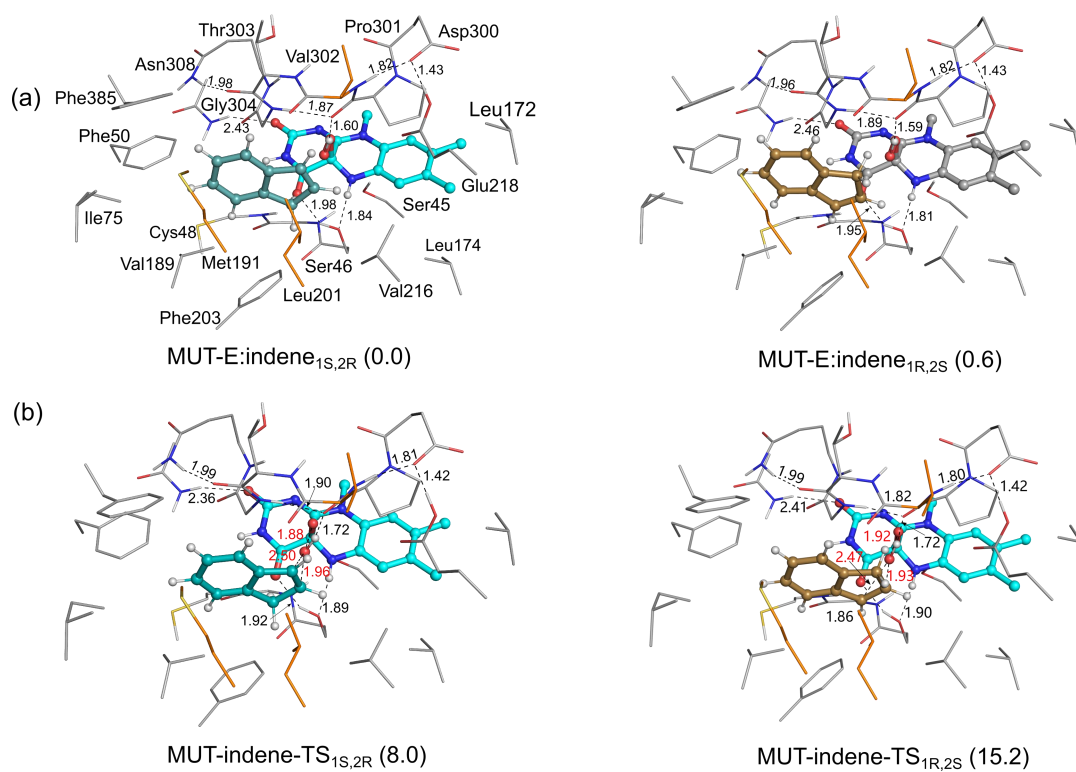

**Figure S16.** Optimized structures of (a) the active site model in complex with indene (**MUT-E:indene**) and (b) the transition states of indene epoxidation (**MUT-indene-TS**) for the reaction of the Phe191Met/Phe201Leu/Ile302Val mutant. For clarity, most of the hydrogen atoms are omitted in the figure. Selected distances are given in Å.

## 18. Results on the intrinsic reaction coordinate (IRC) analysis

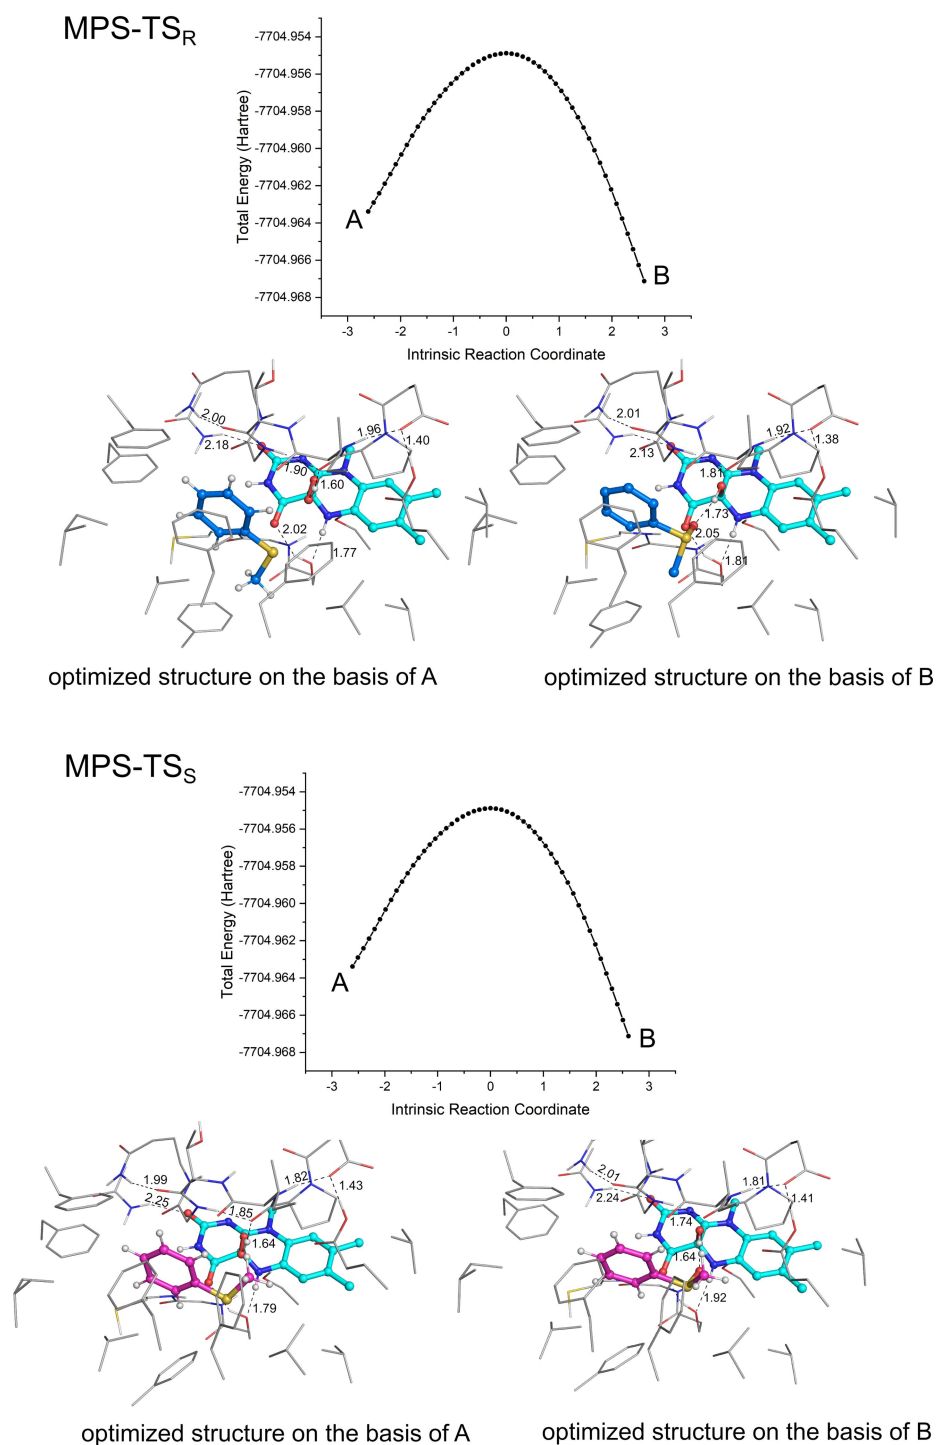

**Figure S17.** The IRC analysis results of **MPS-TS<sub>S</sub>** and **MPS-TS<sub>R</sub>**. For clarity, most of the hydrogen atoms are omitted in the figure for the structures. Selected distances are given in Å.

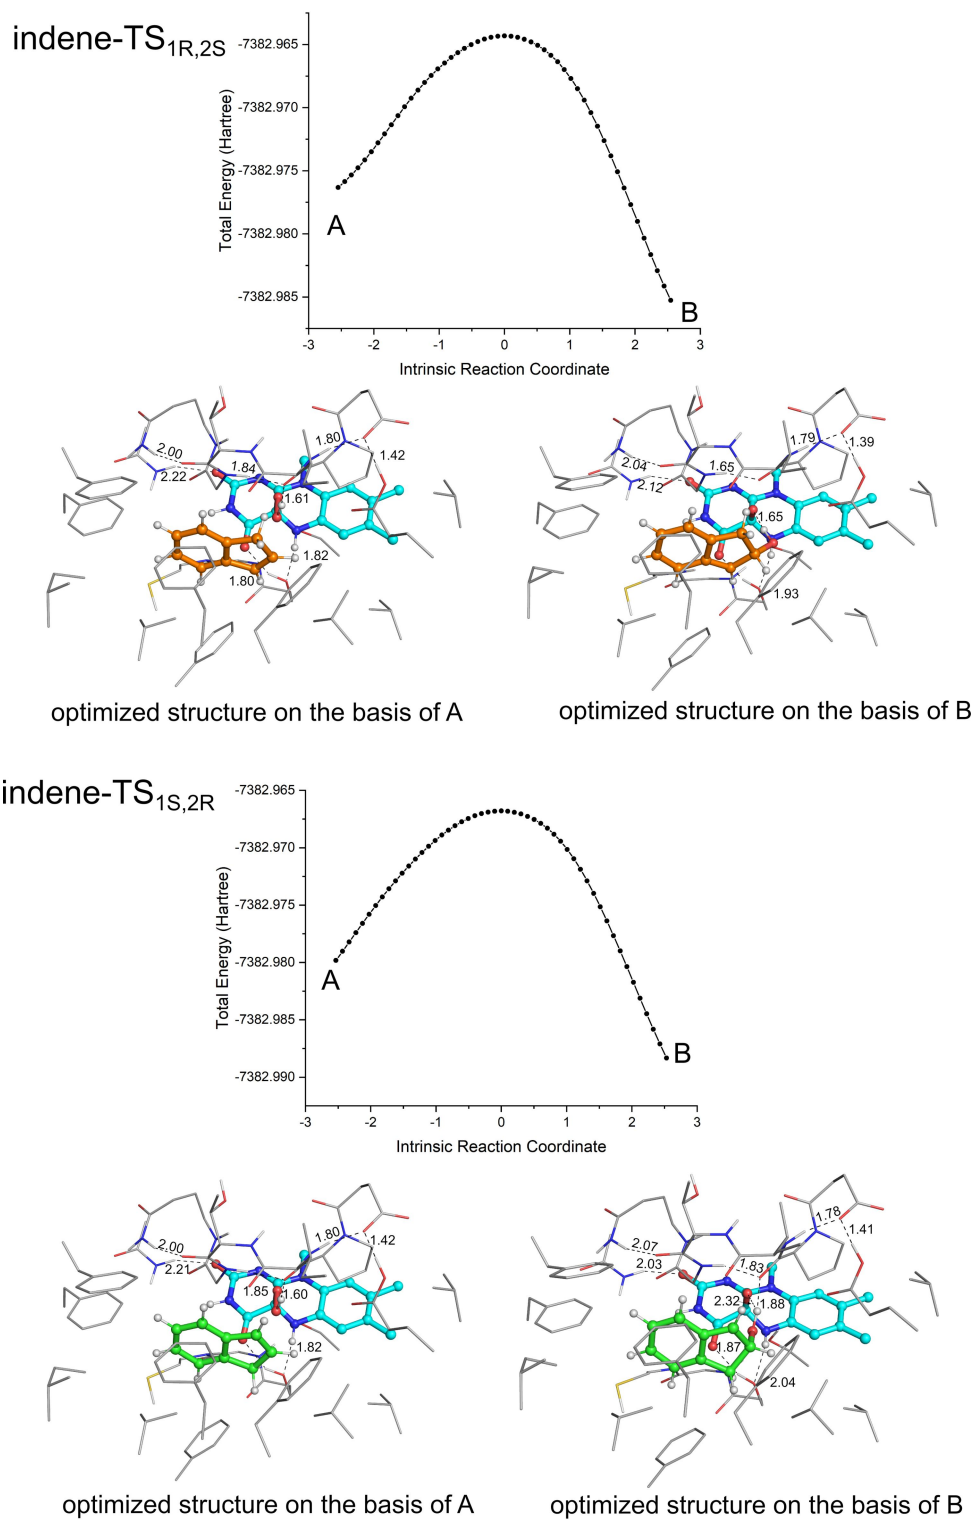

**Figure S18.** The IRC analysis results of **indene-TS<sub>1S,2R</sub>** and **indene-TS<sub>1R,2S</sub>**. For clarity, most of the hydrogen atoms are omitted in the figure for the structures. Selected distances are given in Å.

## 19. Absolute energies and energy corrections

**Table S2.** Calculated absolute energies and energy corrections.

BS1=6-31G(d,p) , BS2=6-311+G(2d,2p)

|                                                         | <b>E<sub>BS1</sub></b><br>(au) | <b>E<sub>BS2</sub></b><br>(au) | <b>E<sub>solvation</sub></b><br>(au) | <b>E<sub>ZPE</sub></b><br>(au) | <b>E<sub>total</sub></b><br>(au) | <b>ΔE<sub>total</sub></b><br>(kcal/mol) |
|---------------------------------------------------------|--------------------------------|--------------------------------|--------------------------------------|--------------------------------|----------------------------------|-----------------------------------------|
| <b>The sulfoxidation of methyl phenyl sulfide (MPS)</b> |                                |                                |                                      |                                |                                  |                                         |
| <b>E:MPS<sub>S</sub></b>                                | -7704.983634                   | -7706.949986                   | -7705.040302                         | 2.695876                       | -7704.310778                     | 0.0                                     |
| <b>E:MPS<sub>R</sub></b>                                | -7704.979510                   | -7706.947040                   | -7705.036116                         | 2.695626                       | -7704.308020                     | 1.7                                     |
| <b>MPS-TS<sub>S</sub></b>                               | -7704.969341                   | -7706.937525                   | -7705.024861                         | 2.693870                       | -7704.299175                     | 7.3                                     |
| <b>MPS-TS<sub>R</sub></b>                               | -7704.954890                   | -7706.924170                   | -7705.010882                         | 2.695328                       | -7704.284834                     | 16.3                                    |
| <b>E:MPSO<sub>S</sub></b>                               | -7705.031542                   | -7707.013247                   | -7705.094529                         | 2.696283                       | -7704.379950                     | -43.4                                   |
| <b>E:MPSO<sub>R</sub></b>                               | -7705.026328                   | -7707.002466                   | -7705.084753                         | 2.697050                       | -7704.363841                     | -33.3                                   |
| <b>The epoxidation of indene</b>                        |                                |                                |                                      |                                |                                  |                                         |
| <b>E:indene<sub>1R,2S</sub></b>                         | -7382.992234                   | -7384.944909                   | -7383.050802                         | 2.706965                       | -7382.296512                     | 0.0                                     |
| <b>E:indene<sub>1S,2R</sub></b>                         | -7382.990541                   | -7384.944131                   | -7383.048161                         | 2.706671                       | -7382.295080                     | 0.9                                     |
| <b>indene-TS<sub>1R,2S</sub></b>                        | -7382.966760                   | -7384.918165                   | -7383.024517                         | 2.705800                       | -7382.270122                     | 16.6                                    |
| <b>indene-TS<sub>1S,2R</sub></b>                        | -7382.971463                   | -7384.923497                   | -7383.028809                         | 2.705666                       | -7382.275177                     | 13.4                                    |
| <b>indene-Int<sub>1S,2R</sub></b>                       | -7383.009958                   | -7384.964166                   | -7383.073481                         | 2.705842                       | -7382.321848                     | -15.9                                   |
| <b>indene-Int<sub>1R,2S</sub></b>                       | -7383.021319                   | -7384.973160                   | -7383.084048                         | 2.707652                       | -7382.328237                     | -19.9                                   |
| <b>E:IO<sub>1R,2S</sub></b>                             | -7383.057193                   | -7385.007681                   | -7383.116910                         | 2.709523                       | -7382.357875                     | -38.5                                   |
| <b>E:IO<sub>1S,2R</sub></b>                             | -7383.053251                   | -7385.004669                   | -7383.113026                         | 2.709040                       | -7382.355405                     | -37.0                                   |

## 20. References

1. D. A. Case, K. Belfon, I. Y. Ben-Shalom, S. R. Brozell, D. S. Cerutti, T. E. Cheatham, III, V. W. D. Cruzeiro, T. A. Darden, R. E. Duke, G. Giambasu, M. K. Gilson, H. Gohlke, A. W. Goetz, R. Harris, S. Izadi, S. A. Izmailov, K. Kasavajhala, A. Kovalenko, R. Krasny, T. Kurtzman, T. S. Lee, S. LeGrand, P. Li, C. Lin, J. Liu, T. Luchko, R. Luo, V. Man, K. M. Merz, Y. Miao, O. Mikhailovskii, G. Monard, H. Nguyen, A. Onufriev, F. Pan, S. Pantano, R. Qi, D. R. Roe, A. Roitberg, C. Sagui, S. Schott-Verdugo, J. Shen, C. L. Simmerling, N. R. Skrynnikov, J. Smith, J. Swails, R. C. Walker, J. Wang, L. Wilson, R. M. Wolf, X. Wu, Y. Xiong, Y. Xue, D. M. York and P. A. Kollman, *AMBER 2020*, University of California, San Francisco, CA, 2020.
2. J. Mongan, D. A. Case and J. A. McCammon, *J Comput Chem*, 2004, **25**, 2038-2048.
3. J. A. Wallace and J. K. Shen, *Journal of Chemical Theory and Computation*, 2011, **7**, 2617-2629.
4. F. Hofer, J. Kraml, U. Kahler, A. S. Kamenik and K. R. Liedl, *Journal of Chemical Information and Modeling*, 2020, **60**, 3030-3042.
5. J. Wang, R. M. Wolf, J. W. Caldwell, P. A. Kollman and D. A. Case, *J Comput Chem*, 2004, **25**, 1157-1174.
6. W. L. Jorgensen, J. Chandrasekhar, J. D. Madura, R. W. Impey and M. L. Klein, *The Journal of Chemical Physics*, 1983, **79**, 926-935.
7. A. Onufriev, D. Bashford and D. A. Case, *Proteins: Structure, Function, and Bioinformatics*, 2004, **55**, 383-394.
8. C. R. Søndergaard, M. H. M. Olsson, M. Rostkowski and J. H. Jensen, *Journal of Chemical Theory and Computation*, 2011, **7**, 2284-2295.
9. E. Jurrus, D. Engel, K. Star, K. Monson, J. Brandi, L. E. Felberg, D. H. Brookes, L. Wilson, J. Chen, K. Liles, M. Chun, P. Li, D. W. Gohara, T. Dolinsky, R. Konecny, D. R. Koes, J. E. Nielsen, T. Head-Gordon, W. Geng, R. Krasny, G.-W. Wei, M. J. Holst, J. A. McCammon and N. A. Baker, *Protein Science*, 2018, **27**, 112-128.
10. U. E. Ukaegbu, A. Kantz, M. Beaton, G. T. Gassner and A. C. Rosenzweig, *Biochemistry*, 2010, **49**, 1678-1688.
11. J. Kratky, D. Eggerichs, T. Heine, S. Hofmann, P. Sowa, R. H. Weiße, D. Tischler and N. Sträter, *Angewandte Chemie International Edition*, 2023, **62**, e202300657.
